# Supplementary material for: Inotuzumab Ozogamicin for Relapsed/Refractory Acute Lymphoblastic Leukemia in the INO-VATE Trial: CD22 Pharmacodynamics, Efficacy, and Safety by Baseline CD22
Source: Oxford University Press journal article supplement (doi:10.1158/1078-0432.ccr-20-2399), 2021-02-18

# **Inotuzumab Ozogamicin for Relapsed/Refractory Acute Lymphoblastic Leukemia in the INO-VATE Trial: CD22 Pharmacodynamics, Efficacy and Safety by Baseline CD22**

Hagop M. Kantarjian<sup>1</sup>, Wendy Stock<sup>2</sup>, Ryan D. Cassaday<sup>3</sup>, Daniel J. DeAngelo<sup>4</sup>, Elias Jabbour<sup>1</sup>, Susan M. O'Brien<sup>5</sup>, Matthias Stelljes<sup>6</sup>, Tao Wang<sup>7</sup>, M. Luisa Paccagnella<sup>8</sup>, Kevin Nguyen<sup>9</sup>, Barbara Sleight<sup>8</sup>, Erik Vandendries<sup>7</sup>, Alexander Neuhof<sup>10</sup>, A. Douglas Laird<sup>11</sup>, and Anjali S. Advani<sup>12</sup>

<sup>1</sup>MD Anderson Cancer Center, Houston, TX, USA; <sup>2</sup>University of Chicago, Chicago, IL, USA; <sup>3</sup>University of Washington School of Medicine and Fred Hutchinson Cancer Research Center, Seattle, WA, USA; <sup>4</sup>Dana-Farber Cancer Institute, Boston, MA, USA; <sup>5</sup>Chao Family Comprehensive Cancer Center, University of California Irvine, Orange, CA, USA; <sup>6</sup>Universitätsklinikum Münster, Münster, Germany; <sup>7</sup>Pfizer Inc., Cambridge, MA, USA; <sup>8</sup>Pfizer Inc., Groton, CT, USA; <sup>9</sup>Navigate BioPharma Services, Inc., a Novartis subsidiary, Carlsbad, CA, USA; <sup>10</sup>Pfizer Pharma GmbH, Berlin, Germany; <sup>11</sup>Pfizer Inc., San Francisco, CA, USA; <sup>12</sup>Cleveland Clinic, Cleveland, OH, USA

## **Supplementary Materials**

### **Table of Contents**

|                                                                                                                                                                              |    |
|------------------------------------------------------------------------------------------------------------------------------------------------------------------------------|----|
| Laboratory Method for CD22 Molecules of Equivalent Soluble Fluorochrome (MESF) Assay .....                                                                                   | 3  |
| Supplementary Table 1. Inotuzumab ozogamicin exposure .....                                                                                                                  | 4  |
| Supplementary Table 2. Overall and the most common TEAEs and SAEs leading to dose delays and dose reduction by CD22 expression (MESF quartiles) per central laboratory ..... | 5  |
| Supplementary Table 3. Patient response to treatment in the ITT population by CD22 positivity per central laboratory .....                                                   | 7  |
| Supplementary Table 4. Efficacy measures by CD22 positivity quartile per local laboratory .....                                                                              | 8  |
| Supplementary Table 5. Percentage of leukemic blasts CD22-positive by response status .....                                                                                  | 10 |

|                                                                                                                                                                                                        |    |
|--------------------------------------------------------------------------------------------------------------------------------------------------------------------------------------------------------|----|
| Supplementary Table 6. Correlation between baseline CD22-positive leukemic blasts (%) level and cytogenetics in the ITT population per central laboratory .....                                        | 11 |
| Supplementary Table 7. Correlation between baseline CD22 Expression (MESF) per central laboratory and cytogenetics - ITT population .....                                                              | 12 |
| Supplementary Table 8. Overall survival by level of CD22 expression and cytogenetics status in the ITT population .....                                                                                | 13 |
| Supplementary Table 9. Selected $\geq$ grade 3 treatment-emergent adverse events by CD22 positivity quartiles per local laboratory .....                                                               | 14 |
| Supplementary Figure 1. Rate of MRD negativity in responding patients .....                                                                                                                            | 15 |
| Supplementary Figure 2. PFS by CD22 expression as assessed by central laboratory MESF and CD22 positivity, and local laboratory CD22 positivity quartile .....                                         | 16 |
| Supplementary Figure 3. Duration of remission by CD22 expression as assessed by MESF and CD22 positivity .....                                                                                         | 19 |
| Supplementary Figure 4. CD22 positivity and CD22 expression in individual responders (CR/CRi) who subsequently relapsed at baseline and EOT/relapse.....                                               | 22 |
| Supplementary Figure 5. CD22 positivity and CD22 expression in individual responders (CR/CRi) who subsequently relapsed at baseline and EOT/relapse for the B1931010 (NCT01363297) phase 1/2 study. 24 |    |
| Supplementary Figure 6. Selected treatment-emergent clustered hepatotoxicity* in patients administered InO by CD22 positivity and CD22 MESF quartile.....                                              | 26 |

### **Laboratory Method for CD22 Molecules of Equivalent Soluble Fluorochrome (MESF) Assay**

MESF values were calculated using QuantiBRITE PE Fluorescence Quantitation Kit (BD Biosciences, CA, USA). Each lot-specific QuantiBRITE PE tube contains a lyophilized pellet of beads conjugated with four known concentration levels of phycoerythrin (PE). The QuantiBRITE PE tubes were reconstituted and analyzed at the same instrument settings as sample of interest on a BD FACSCanto II flow cytometer. 10,000 PE bead events were collected and when displayed on PE-fluorescence histogram, four peaks are exhibited by fluorescence intensities, corresponding to the varying concentration levels of PE. With the fluorescent intensities of PE bead populations and values of PE molecules per bead (provided with kit), a calibration curve can be extrapolated that enables MFI values to be converted into PE molecules bound or MESF unit. Using this formula, MESF was calculated for CD22 on cells of B-cell acute lymphoblastic leukemia. At the time the study was performed, there were no data available correlating CD22 expression with clinical benefit from which a threshold defining positive versus negative could be established. No desirable established threshold was used. The percentage of CD22 positivity was quantified using the Fluorescence Minus One (FMO) control and reported as such; the characterization (positive or negative) of marker expression was assessed qualitatively by the overall expression shift.

**Supplementary Table 1. Inotuzumab ozogamicin exposure**

|                                                       | CD22 MESF quartiles per central laboratory |                     |                     |                     |                     |                     | CD22 positivity quartiles per local laboratory |                     |                     |                     |                     |
|-------------------------------------------------------|--------------------------------------------|---------------------|---------------------|---------------------|---------------------|---------------------|------------------------------------------------|---------------------|---------------------|---------------------|---------------------|
|                                                       | Total<br>N=164                             | Q1<br>N=30          | Q2<br>N=38          | Q3<br>N=41          | Q4<br>N=33          | Q2-4<br>N=112       | Q1<br>N=38                                     | Q2<br>N=38          | Q3<br>N=41          | Q4<br>N=35          | Q2-4<br>N=114       |
| <b>Dose reduction, n (%)</b>                          |                                            |                     |                     |                     |                     |                     |                                                |                     |                     |                     |                     |
| 0                                                     | 143 (87.2)                                 | 24 (80.0)           | 34 (89.5)           | 35 (85.4)           | 29 (87.9)           | 98 (87.5)           | 34 (89.5)                                      | 33 (86.8)           | 34 (82.9)           | 30 (85.7)           | 97 (85.1)           |
| ≥1                                                    | 21 (12.8)                                  | 6 (20.0)            | 4 (10.5)            | 6 (14.6)            | 4 (12.1)            | 14 (12.5)           | 4 (10.5)                                       | 5 (13.2)            | 7 (17.1)            | 5 (14.3)            | 17 (14.9)           |
| <b>Dose delay, n (%)</b>                              |                                            |                     |                     |                     |                     |                     |                                                |                     |                     |                     |                     |
| 0                                                     | 91 (55.5)                                  | 14 (46.7)           | 17 (44.7)           | 22 (53.7)           | 23 (69.7)           | 62 (55.4)           | 20 (52.6)                                      | 22 (57.9)           | 23 (56.1)           | 18 (51.4)           | 63 (55.3)           |
| ≥1                                                    | 73 (44.5)                                  | 16 (53.3)           | 21 (55.3)           | 19 (46.3)           | 10 (30.3)           | 50 (44.6)           | 18 (47.4)                                      | 16 (42.1)           | 18 (43.9)           | 17 (48.6)           | 51 (44.7)           |
| <b>Actual overall dose (mg/m<sup>2</sup>)</b>         |                                            |                     |                     |                     |                     |                     |                                                |                     |                     |                     |                     |
| Mean (SD)                                             | 4.32 (2.31)                                | 4.42 (2.21)         | 4.52 (1.98)         | 4.32 (2.22)         | 4.06 (2.44)         | 4.31 (2.20)         | 4.35 (2.08)                                    | 4.53 (2.54)         | 4.61 (2.44)         | 4.09 (2.10)         | 4.42 (2.36)         |
| Median<br>(range)                                     | 4.22<br>(0.78–9.59)                        | 4.21<br>(1.33–9.16) | 4.52<br>(0.82–9.18) | 4.20<br>(0.79–9.29) | 4.64<br>(0.78–9.59) | 4.30<br>(0.78–9.59) | 4.27<br>(0.82–9.59)                            | 4.51<br>(0.81–9.46) | 3.81<br>(0.78–9.59) | 4.38<br>(0.79–9.09) | 4.32<br>(0.78–9.59) |
| <b>Actual dose intensity (mg/m<sup>2</sup>/cycle)</b> |                                            |                     |                     |                     |                     |                     |                                                |                     |                     |                     |                     |
| Mean (SD)                                             | 1.54 (0.32)                                | 1.58 (0.28)         | 1.55 (0.28)         | 1.55 (0.32)         | 1.48 (0.37)         | 1.53 (0.32)         | 1.58 (0.27)                                    | 1.58 (0.33)         | 1.49 (0.33)         | 1.50 (0.31)         | 1.52 (0.32)         |
| Median<br>(range)                                     | 1.58<br>(0.77–2.06)                        | 1.57<br>(1.06–2.06) | 1.53<br>(0.81–2.03) | 1.61<br>(0.77–1.99) | 1.58<br>(0.78–1.91) | 1.58<br>(0.77–2.03) | 1.60<br>(0.82–1.94)                            | 1.66<br>(0.80–2.06) | 1.50<br>(0.77–2.01) | 1.50<br>(0.79–1.99) | 1.55<br>(0.77–2.06) |

MESF, molecules of equivalent soluble fluorochrome; SD, standard deviation.

**Supplementary Table 2. Overall and the most common TEAEs and SAEs leading to dose delays and dose reduction by CD22 expression (MESF quartiles) per central laboratory**

|                                      | InO       | SC       | Total     |
|--------------------------------------|-----------|----------|-----------|
| <b>Dose delays, n (%)*</b>           |           |          |           |
| <b>CD22 MESF Q1</b>                  | N=30      | N=33     | N=63      |
| Any AEs                              | 14 (46.7) | 7 (21.2) | 21 (33.3) |
| Thrombocytopenia                     | 6 (20.0)  | 1 (3.0)  | 7 (11.1)  |
| Neutropenia                          | 6 (20.0)  | 0        | 6 (9.5)   |
| Any SAEs                             | 4 (13.3)  | 3 (9.1)  | 7 (11.1)  |
| Febrile neutropenia                  | 1 (3.3)   | 1 (3.0)  | 2 (3.2)   |
| Neutropenic sepsis                   | 1 (3.3)   | 0        | 1 (1.6)   |
| Pyrexia                              | 1 (3.3)   | 0        | 1 (1.6)   |
| Stomatitis                           | 1 (3.3)   | 0        | 1 (1.6)   |
| Sepsis                               | 0         | 1 (3.0)  | 1 (1.6)   |
| Thrombophlebitis                     | 0         | 1 (3.0)  | 1 (1.6)   |
| <b>CD22 MESF Q2</b>                  | N=38      | N=27     | N=65      |
| Any AEs                              | 20 (52.6) | 6 (22.2) | 26 (40.0) |
| Neutropenia                          | 7 (18.4)  | 0        | 7 (10.8)  |
| Febrile neutropenia                  | 4 (10.5)  | 1 (3.7)  | 5 (7.7)   |
| Thrombocytopenia                     | 3 (7.9)   | 0        | 3 (4.6)   |
| Any SAEs                             | 8 (21.1)  | 1 (3.7)  | 9 (13.8)  |
| Febrile neutropenia                  | 2 (5.3)   | 1 (3.7)  | 3 (4.6)   |
| <b>CD22 MESF Q3</b>                  | N=41      | N=25     | N=66      |
| Any AEs                              | 18 (43.9) | 2 (8.0)  | 20 (30.3) |
| Neutropenia                          | 9 (22.0)  | 0        | 9 (13.6)  |
| Hyperbilirubinaemia                  | 4 (9.8)   | 0        | 4 (6.1)   |
| Alanine aminotransferase increased   | 2 (4.9)   | 0        | 2 (3.0)   |
| Aspartate aminotransferase increased | 2 (4.9)   | 0        | 2 (3.0)   |
| Febrile neutropenia                  | 2 (4.9)   | 0        | 2 (3.0)   |
| Any SAEs                             | 7 (17.1)  | 1 (4.0)  | 8 (12.1)  |
| Febrile neutropenia                  | 2 (4.9)   | 0        | 2 (3.0)   |
| <b>CD22 MESF Q4</b>                  | N=33      | N=32     | N=65      |
| Any AEs                              | 13 (39.4) | 1 (3.1)  | 14 (21.5) |
| Gamma-glutamyltransferase increased  | 5 (15.2)  | 0        | 5 (7.7)   |
| Aspartate aminotransferase increased | 4 (12.1)  | 0        | 4 (6.2)   |
| Alanine aminotransferase increased   | 3 (9.1)   | 0        | 3 (4.6)   |
| Thrombocytopenia                     | 3 (9.1)   | 0        | 3 (4.6)   |
| Blood alkaline phosphatase increased | 2 (6.1)   | 0        | 2 (3.1)   |
| Any SAEs                             | 4 (12.1)  | 0        | 4 (6.2)   |
| Septic shock                         | 2 (6.1)   | 0        | 2 (3.1)   |
| <b>CD22 MESF Q2-4</b>                | N=112     | N=84     | N=196     |
| Any AEs                              | 51 (45.5) | 9 (10.7) | 60 (30.6) |
| Neutropenia                          | 17 (15.2) | 0        | 17 (8.7)  |
| Febrile neutropenia                  | 7 (6.3)   | 1 (1.2)  | 8 (4.1)   |
| Aspartate aminotransferase increased | 7 (6.3)   | 0        | 7 (3.6)   |
| Gamma-glutamyltransferase increased  | 7 (6.3)   | 0        | 7 (3.6)   |
| Thrombocytopenia                     | 7 (6.3)   | 0        | 7 (3.6)   |
| Alanine aminotransferase increased   | 5 (4.5)   | 1 (1.2)  | 6 (3.1)   |
| Hyperbilirubinaemia                  | 5 (4.5)   | 1 (1.2)  | 6 (3.1)   |
| Blood alkaline phosphatase increased | 3 (2.7)   | 0        | 3 (1.5)   |
| Pneumonia                            | 3 (2.7)   | 0        | 3 (1.5)   |

|                                      |              |             |              |
|--------------------------------------|--------------|-------------|--------------|
| Pyrexia                              | 2 (1.8)      | 1 (1.2)     | 3 (1.5)      |
| Asthenia                             | 2 (1.8)      | 0           | 2 (1.0)      |
| Any SAEs                             | 19 (17.0)    | 2 (2.4)     | 21 (10.7)    |
| Febrile neutropenia                  | 5 (4.5)      | 1 (1.2)     | 6 (3.1)      |
| Pneumonia                            | 3 (2.7)      | 0           | 3 (1.5)      |
| Septic shock                         | 2 (1.8)      | 0           | 2 (1.0)      |
| <b>Dose reduction, n (%)*</b>        |              |             |              |
| <b>CD22 MESF Q1</b>                  | <b>N=30</b>  | <b>N=33</b> | <b>N=63</b>  |
| Any AEs                              | 3 (10.0)     | 1 (3.0)     | 4 (6.3)      |
| Neutropenia                          | 2 (6.7)      | 0           | 2 (3.2)      |
| Alanine aminotransferase increased   | 1 (3.3)      | 0           | 1 (1.6)      |
| Platelet count decreased             | 1 (3.3)      | 0           | 1 (1.6)      |
| Systemic infection                   | 0            | 1 (3.0)     | 1 (1.6)      |
| Any SAEs                             | 0            | 0           | 0            |
| <b>CD22 MESF Q2</b>                  | <b>N=38</b>  | <b>N=27</b> | <b>N=65</b>  |
| Any AEs                              | 1 (2.6)      | 1 (3.7)     | 2 (3.1)      |
| Thrombocytopenia                     | 1 (2.6)      | 0           | 1 (1.5)      |
| Headache                             | 0            | 1 (3.7)     | 1 (1.5)      |
| Pain in extremity                    | 0            | 1 (3.7)     | 1 (1.5)      |
| Any SAEs                             | 0            | 0           | 0            |
| <b>CD22 MESF Q3</b>                  | <b>N=41</b>  | <b>N=25</b> | <b>N=66</b>  |
| Any AEs                              | 0            | 1 (4.0)     | 1 (1.5)      |
| Sepsis                               | 0            | 1 (4.0)     | 1 (1.5)      |
| Any SAEs                             | 0            | 1 (4.0)     | 1 (1.5)      |
| Sepsis                               | 0            | 1 (4.0)     | 1 (1.5)      |
| <b>CD22 MESF Q4</b>                  | <b>N=33</b>  | <b>N=32</b> | <b>N=65</b>  |
| Any AEs                              | 1 (3.0)      | 0           | 1 (1.5)      |
| Aspartate aminotransferase increased | 1 (3.0)      | 0           | 1 (1.5)      |
| Any SAEs                             | 0            | 0           | 0            |
| <b>CD22 MESF Q2-4</b>                | <b>N=112</b> | <b>N=84</b> | <b>N=196</b> |
| Any AEs                              | 2 (1.8)      | 2 (2.4)     | 4 (2.0)      |
| Aspartate aminotransferase increased | 1 (0.9)      | 0           | 1 (0.5)      |
| Thrombocytopenia                     | 1 (0.9)      | 0           | 1 (0.5)      |
| Headache                             | 0            | 1 (1.2)     | 1 (0.5)      |
| Pain in extremity                    | 0            | 1 (1.2)     | 1 (0.5)      |
| Sepsis                               | 0            | 1 (1.2)     | 1 (0.5)      |
| Any SAEs                             | 0            | 1 (1.2)     | 1 (0.5)      |
| Sepsis                               | 0            | 1 (1.2)     | 1 (0.5)      |

\* A patient may have more than 1 dose reductions and/or treatment delays.

TEAEs were defined as AEs that started on or after Cycle 1 Day 1 but within 42 days of the last dose and all treatment-related AEs thereafter. All SOS/VOD events within 2 years of randomization date regardless of causal attribution to study therapy were included. Medical Dictionary for Regulatory Activities (v19.1) coding dictionary is applied.

AE, adverse event; InO, inotuzumab ozogamicin; MESF, molecules of equivalent soluble fluorochrome; Q, quartile; SAE, serious AE; SC, standard of care chemotherapy; SOS, sinusoidal obstruction syndrome; TEAE, treatment-emergent AE; VOD, veno-occlusive disease.

**Supplementary Table 3. Patient response to treatment in the ITT population by CD22 positivity per central laboratory**

|                                                        | <b>InO</b>       | <b>SC</b>        | <b>Rate difference,<br/>% (97.5% CI)</b> | <b><i>P</i> value</b> |
|--------------------------------------------------------|------------------|------------------|------------------------------------------|-----------------------|
| <b>Baseline CD22 positivity <math>\geq 90\%</math></b> |                  |                  |                                          |                       |
| N                                                      | 107              | 93               |                                          |                       |
| CR/CRi, % (95% CI)                                     | 78.5 (69.5–85.9) | 35.5 (25.8–46.1) | 43.0 (28.8–57.3)                         | <0.0001               |
| CR, % (95% CI)                                         | 42.1 (32.6–52.0) | 16.1 (9.3–25.2)  | 25.9 (12.2–39.6)                         | <0.0001               |
| CRi, % (95% CI)                                        | 36.4 (27.4–46.3) | 19.4 (11.9–28.9) | 17.1 (3.2–31.0)                          | 0.0038                |
| <b>Baseline CD22 positivity &lt;90%</b>                |                  |                  |                                          |                       |
| N                                                      | 35               | 36               |                                          |                       |
| CR/CRi, % (95% CI)                                     | 65.7 (47.8–80.9) | 30.6 (16.3–48.1) | 35.2 (10.3–60.0)                         | 0.0015                |
| CR, % (95% CI)                                         | 20.0 (8.4–36.9)  | 19.4 (8.2–36.0)  | 0.6 (–20.6–21.7)                         | 0.4765                |
| CRi, % (95% CI)                                        | 45.7 (28.8–63.4) | 11.1 (3.1–26.1)  | 34.6 (12.4–56.8)                         | 0.0012                |

CI, confidence interval; CR, complete remission; CRi, complete remission with incomplete hematologic recovery; InO, inotuzumab ozogamicin; ITT, intent to treat; SC, standard of care chemotherapy.

**Supplementary Table 4. Efficacy measures by CD22 positivity quartile per local laboratory**

|                                                            | <b>Q1</b>           | <b>Q2</b>           | <b>Q3</b>           | <b>Q4</b>           | <b>Q2–4</b>         |
|------------------------------------------------------------|---------------------|---------------------|---------------------|---------------------|---------------------|
| <b>InO, n</b>                                              | 38                  | 38                  | 41                  | 35                  | 114                 |
| <b>SC, n</b>                                               | 34                  | 38                  | 37                  | 43                  | 118                 |
| <b>CR/CRi, n (%)</b>                                       |                     |                     |                     |                     |                     |
| InO*                                                       | 31 (81.58)          | 26 (68.42)          | 30 (73.17)          | 27 (77.14)          | 83 (72.81)          |
| SC*                                                        | 14 (41.18)          | 14 (36.84)          | 10 (27.03)          | 9 (20.93)           | 33 (27.97)          |
| <i>P</i> <sup>†</sup>                                      | 0.0002              | 0.0029              | <0.0001             | <0.0001             | NE                  |
| <b>MRD-negative among patients achieving CR/CRi, n (%)</b> |                     |                     |                     |                     |                     |
| InO                                                        | 27 (87.1)           | 18 (69.2)           | 20 (66.7)           | 21 (77.8)           | 59 (71.08)          |
| SC                                                         | 7 (50.0)            | 3 (21.4)            | 3 (30.0)            | 5 (55.6)            | 11 (33.33)          |
| <i>P</i> <sup>†</sup>                                      | 0.0121              | 0.0048              | 0.0486              | 0.1930              | NE                  |
| <b>DoR, median (95% CI), months</b>                        |                     |                     |                     |                     |                     |
| InO                                                        | 5.9 (4.2–11.5)      | 4.0 (2.3–6.0)       | 5.4 (3.9–12.9)      | 5.2 (3.2–9.2)       | 4.9 (3.9–6.6)       |
| SC                                                         | 6.8 (0.8–9.2)       | 3.5 (0.7–6.9)       | 3.1 (0.3–8.0)       | 2.7 (0.2–4.8)       | 3.1 (1.6–4.9)       |
| HR <sup>‡</sup> (97.5% CI)                                 | 0.834 (0.325–2.139) | 0.935 (0.414–2.110) | 0.517 (0.189–1.416) | 0.257 (0.094–0.702) | 0.525 (0.312–0.882) |
| <i>P</i> <sup>‡</sup>                                      | 0.3320              | 0.4262              | 0.0677              | 0.0006              | 0.0023              |
| <b>PFS, median (95% CI), months</b>                        |                     |                     |                     |                     |                     |
| InO                                                        | 5.8 (3.9–9.4)       | 3.3 (2.6–4.8)       | 5.7 (2.9–7.1)       | 5.1 (3.4–8.0)       | 4.8 (3.4–5.7)       |
| SC                                                         | 2.3 (1.5–5.6)       | 2.0 (1.2–3.1)       | 1.7 (1.3–2.6)       | 1.4 (1.2–1.8)       | 1.6 (1.3–2.1)       |
| HR <sup>‡</sup> (97.5% CI)                                 | 0.493 (0.258–0.940) | 0.745 (0.426–1.302) | 0.393 (0.212–0.731) | 0.261 (0.136–0.501) | 0.436 (0.311–0.613) |
| <i>P</i> <sup>‡</sup>                                      | 0.0060              | 0.1168              | 0.0002              | <0.0001             | <0.0001             |
| <b>OS, median (95% CI), months</b>                         |                     |                     |                     |                     |                     |
| InO                                                        | 8.6 (5.6–16.5)      | 5.8 (3.9–9.4)       | 7.7 (5.6–13.4)      | 9.3 (5.0–13.3)      | 7.2 (5.7–9.4)       |
| SC                                                         | 12.2 (6.9–14.5)     | 8.0 (2.9–14.2)      | 5.3 (3.1–7.7)       | 5.5 (4.1–7.8)       | 5.6 (4.5–7.7)       |
| HR <sup>‡</sup> (97.5% CI)                                 | 0.801 (0.431–1.487) | 1.051 (0.601–1.838) | 0.515 (0.290–0.913) | 0.624 (0.350–1.114) | 0.713 (0.515–0.987) |
| <i>P</i> <sup>‡</sup>                                      | 0.2102              | 0.5792              | 0.0040              | 0.0325              | 0.0094              |



\* Differences were not significant among quartiles in the InO ( $P=0.5906$ ) or SC arm ( $P=0.2061$ );  $P$  values are from two-sided Chi-square test or Fisher's exact test (if any cell count is  $<5$ ).

<sup>†</sup>  $P$  values are from one-sided Chi-square test or Fisher's exact test (if any cell count is  $<5$ ).

<sup>‡</sup> HR, unstratified;  $P$  value, from 1-sided unstratified log-rank test.

CI, confidence interval; CR, complete remission; CRi, CR with incomplete hematologic recovery; DoR, duration of remission; HR, hazard ratio; InO, inotuzumab ozogamicin; MRD, minimal residual disease; NE, not estimated; OS, overall survival; PFS, progression-free survival; Q, quartile; SC, standard of care chemotherapy.

**Supplementary Table 5. Percentage of leukemic blasts CD22-positive by response status**

|                                    | INO-VATE      |              |                 |               | Phase 1/2 Study |
|------------------------------------|---------------|--------------|-----------------|---------------|-----------------|
|                                    | Responders*   |              | Non-responders* |               | Responders*     |
|                                    | InO<br>(N=24) | SC<br>(N=14) | InO<br>(N=43)   | SC<br>(N=112) | InO<br>(N=24)   |
| <b>CD22 leukemic blasts, n (%)</b> |               |              |                 |               |                 |
| Baseline                           |               |              |                 |               |                 |
| ≥90%                               | 15 (62.5)     | 13 (92.9)    | 23 (53.5)       | 60 (53.6)     | 19 (79.2)       |
| ≥70–<90                            | 5 (20.8)      | 0            | 10 (23.3)       | 13 (11.6)     | 3 (12.5)        |
| >0–<70                             | 2 (8.3)       | 1 (7.1)      | 2 (4.7)         | 12 (10.7)     | 2 (8.3)         |
| 0                                  | 0             | 0            | 0               | 0             | 0               |
| Not evaluable                      | 1 (4.2)       | 0            | 1 (2.3)         | 4 (3.6)       | 0               |
| Missing                            | 1 (4.2)       | 0            | 7 (16.3)        | 23 (20.5)     | 0               |
| EOT/Relapse <sup>†</sup>           |               |              |                 |               |                 |
| ≥90%                               | 1 (4.2)       | 4 (28.6)     | 2 (4.7)         | 12 (10.7)     | 3 (12.5)        |
| ≥70–<90                            | 1 (4.2)       | 2 (14.3)     | 0               | 2 (1.8)       | 2 (8.3)         |
| >0–<70                             | 8 (33.3)      | 0            | 3 (7.0)         | 2 (1.8)       | 5 (20.8)        |
| 0                                  | 0             | 0            | 0               | 0             | 4 (16.7)        |
| Not evaluable                      | 2 (8.3)       | 0            | 1 (2.3)         | 2 (1.8)       | 0               |
| Missing                            | 12 (50.0)     | 8 (57.1)     | 37 (86.0)       | 94 (83.9)     | 10 (41.7)       |
| <b>CD22 expression as MESF</b>     |               |              |                 |               |                 |
| Baseline                           | N=20          | N=14         | N=29            | N=65          | N=18            |
| Median                             | 3795.0        | 4641.5       | 4125.0          | 2963.0        | 178291.0        |
| Range                              | 853–10947     | 470–10226    | 442–26812       | 199–45371     | 145172–218104   |
| EOT/Relapse                        | N=10          | N=6          | N=5             | N=16          | N=14            |
| Median                             | 275.5         | 3694.5       | 873.0           | 3242.5        | 119445.5        |
| Range                              | 74–4438       | 753–5027     | 234–3766        | 381–28748     | 0–190567        |

\* Responders included patients who achieved CR or CRi but subsequently relapsed; non-responders included patients who did not achieve CR or CRi.

<sup>†</sup>Relapse only applicable for responders (i.e., patients who responded to treatment and subsequently relapsed).

CR, complete remission; CRi, complete remission with incomplete hematologic recovery; EOT, end of treatment; InO, inotuzumab ozogamicin; MESF, molecules of equivalent soluble fluorochrome; SC, standard of care.

**Supplementary Table 6. Correlation between baseline CD22-positive leukemic blasts (%) level and cytogenetics in the ITT population per central laboratory**

|                                     | CD22-positive leukemic blasts at baseline |             |              | <i>P</i> * |
|-------------------------------------|-------------------------------------------|-------------|--------------|------------|
|                                     | ≥90%                                      | <90%        | Missing data |            |
| <b>Overall</b>                      | <b>N=200</b>                              | <b>N=71</b> | <b>N=55</b>  |            |
| KMT2A–                              | 130 (65.0)                                | 36 (50.7)   | 11 (20.0)    | 0.0466     |
| KMT2A missing                       | 43 (21.5)                                 | 13 (18.3)   | 43 (78.2)    | 0.6132     |
| Any KMT2A abnormality (KMT2A+)      | 27 (13.5)                                 | 22 (31.0)   | 1 (1.8)      | 0.0020     |
| KMT2A rearrangements                | 7 (3.5)                                   | 12 (16.9)   | 0            | 0.0005     |
| t(4;11)                             | 3 (1.5)                                   | 11 (15.5)   | 0            | <0.0001    |
| Normal with metaphases analyzed ≥20 | 40 (20.0)                                 | 14 (19.7)   | 15 (27.3)    | 1.0000     |
| Ph+                                 | 29 (14.5)                                 | 15 (21.1)   | 5 (9.1)      | 0.1951     |
| Complex                             | 35 (17.5)                                 | 10 (14.1)   | 5 (9.1)      | 0.5809     |
| <b>InO</b>                          | <b>N=107</b>                              | <b>N=35</b> | <b>N=22</b>  |            |
| KMT2A–                              | 69 (64.5)                                 | 18 (51.4)   | 3 (13.6)     | 0.2301     |
| KMT2A missing                       | 26 (24.3)                                 | 6 (17.1)    | 19 (86.4)    | 0.4870     |
| Any KMT2A abnormality (KMT2A+)      | 12 (11.2)                                 | 11 (31.4)   | 0            | 0.0080     |
| KMT2A rearrangements                | 4 (3.7)                                   | 7 (20.0)    | 0            | 0.0050     |
| t(4;11)                             | 0                                         | 6 (17.1)    | 0            | 0.0002     |
| Normal with metaphases analyzed ≥20 | 24 (22.4)                                 | 6 (17.1)    | 5 (22.7)     | 0.6358     |
| Ph+                                 | 14 (13.1)                                 | 6 (17.1)    | 2 (9.1)      | 0.5794     |
| Complex                             | 21 (19.6)                                 | 5 (14.3)    | 2 (9.1)      | 0.6173     |
| <b>SC</b>                           | <b>N=93</b>                               | <b>N=36</b> | <b>N=33</b>  |            |
| KMT2A–                              | 61 (65.6)                                 | 18 (50.0)   | 8 (24.2)     | 0.1119     |
| KMT2A missing                       | 17 (18.3)                                 | 7 (19.4)    | 24 (72.7)    | 1.0000     |
| Any KMT2A abnormality (KMT2A+)      | 15 (16.1)                                 | 11 (30.6)   | 1 (3.0)      | 0.0869     |
| KMT2A rearrangements                | 3 (3.2)                                   | 5 (13.9)    | 0            | 0.0381     |
| t(4;11)                             | 3 (3.2)                                   | 5 (13.9)    | 0            | 0.0381     |
| Normal with metaphases analyzed ≥20 | 16 (17.2)                                 | 8 (22.2)    | 10 (30.3)    | 0.6145     |
| Ph+                                 | 15 (16.1)                                 | 9 (25.0)    | 3 (9.1)      | 0.3129     |
| Complex                             | 14 (15.1)                                 | 5 (13.9)    | 3 (9.1)      | 1.0000     |

Values are n or n (%).

KMT2A by central laboratory FISH analysis (KMT2A ≥1%), except for t(4;11), which was assessed locally by karyotyping. Ph+ status by central laboratory FISH analysis (*BCR ABL* ≥7%) or local laboratory results or medical history (if both central FISH or local results missing).

\*2-sided *P*-value from Fisher's exact test that was used to compare rates between CD22 ≥90% and CD22 <90% subgroups, patients with missing baseline CD22 data were excluded from the calculation.

FISH, fluorescence *in situ* hybridization; InO, inotuzumab ozogamicin; ITT, intent to treat; KMT2A, histone-lysine N-methyltransferase 2A; Ph+, Philadelphia chromosome-positive; SC, standard of care chemotherapy.

**Supplementary Table 7. Correlation between baseline CD22 Expression (MESF) per central laboratory and cytogenetics - ITT population**

|                     | N  | MESF            |                        | <i>P</i> value* |
|---------------------|----|-----------------|------------------------|-----------------|
|                     |    | Mean (SD)       | Median (range)         |                 |
| Normal cytogenetics |    |                 |                        |                 |
| InO                 | 30 | 4538.1 (3223.0) | 3903.5 (971.0–17100.0) | NA              |
| SC                  | 24 | 3541.3 (3349.2) | 1847.0 (118.0–11920.0) | NA              |
| Total               | 54 | 4095.1 (3286.6) | 3586.5 (118.0–17100.0) | NA              |
| KMT2A Rearrangement |    |                 |                        |                 |
| InO                 | 11 | 1878.9 (1344.8) | 1327.0 (442.0–5236.0)  | 0.0120          |
| SC                  | 8  | 1482.0 (1698.0) | 608.0 (119.0–5122.0)   | 0.1080          |
| Total               | 19 | 1711.8 (1471.9) | 1289.0 (119.0–5236.0)  | 0.0033          |
| KMT2A t(4;11)       |    |                 |                        |                 |
| InO                 | 6  | 992.8 (586.1)   | 1048.0 (259.0–1833.0)  | 0.0120          |
| SC                  | 8  | 2060.9 (2492.5) | 608.0 (119.0–6603.0)   | 0.2617          |
| Total               | 14 | 1603.1 (1943.7) | 762.0 (119.0–6603.0)   | 0.0086          |

KMT2A Rearrangements by central laboratory break-apart FISH analysis (KMT2A  $\geq 1\%$ ); t(4;11) assessed locally by karyotyping displayed separately.

\*P value based on pairwise comparison of t(4;11) versus normal cytogenetics, KMT2A+/ Rearrangement versus normal cytogenetics.

FISH, fluorescence *in situ* hybridization; InO, inotuzumab ozogamicin; ITT, intent to treat; KMT2A, histone-lysine N-methyltransferase 2A; SC, standard of care chemotherapy; SD, standard deviation.

**Supplementary Table 8. Overall survival by level of CD22 expression and cytogenetics status in the ITT population**

|                                                        | N  | Number of deaths | Overall survival in months, median (95% CI) | Unstratified HR (97.5% CI)* | P value† |
|--------------------------------------------------------|----|------------------|---------------------------------------------|-----------------------------|----------|
| <b>CD22-positive ≥90% with normal cytogenetics</b>     |    |                  |                                             |                             |          |
| InO                                                    | 24 | 14               | 8.7 (7.1–NE)                                |                             |          |
| SC                                                     | 16 | 15               | 4.5 (2.0–9.4)                               |                             |          |
|                                                        |    |                  |                                             | 0.308 (0.130–0.729)         | 0.0006   |
| <b>CD22-positive &lt;90% with normal cytogenetics</b>  |    |                  |                                             |                             |          |
| InO                                                    | 6  | 5                | 6.5 (4.8–NE)                                |                             |          |
| SC                                                     | 8  | 6                | 12.2 (1.6–27.8)                             |                             |          |
|                                                        |    |                  |                                             | 1.310 (0.301–5.701)         | 0.6601   |
| <b>CD22-positive ≥90% with KMT2A-</b>                  |    |                  |                                             |                             |          |
| InO                                                    | 69 | 50               | 8.6 (6.0–13.3)                              |                             |          |
| SC                                                     | 61 | 51               | 6.8 (4.6–9.1)                               |                             |          |
|                                                        |    |                  |                                             | 0.639 (0.407–1.002)         | 0.0121   |
| <b>CD22-positive &lt;90% with KMT2A-</b>               |    |                  |                                             |                             |          |
| InO                                                    | 18 | 17               | 5.2 (3.0–8.6)                               |                             |          |
| SC                                                     | 18 | 14               | 12.2 (1.6–18.8)                             |                             |          |
|                                                        |    |                  |                                             | 1.704 (0.734–3.955)         | 0.9246   |
| <b>CD22-positive ≥90% with KMT2A+/Rearrangement</b>    |    |                  |                                             |                             |          |
| InO                                                    | 4  | 4                | 5.5 (2.2–10.3)                              |                             |          |
| SC                                                     | 3  | 3                | 6.0 (5.5–22.0)                              |                             |          |
|                                                        |    |                  |                                             | 1.852 (0.260–13.198)        | 0.7624   |
| <b>CD22-positive &lt;90% with KMT2A+/Rearrangement</b> |    |                  |                                             |                             |          |
| InO                                                    | 7  | 7                | 5.8 (2.2–7.4)                               |                             |          |
| SC                                                     | 5  | 5                | 2.5 (1.0–14.5)                              |                             |          |
|                                                        |    |                  |                                             | 1.494 (0.304–7.341)         | 0.7151   |

\* Cox proportional hazards model was used.

† One-sided unstratified log rank test.

InO, inotuzumab ozogamicin; ITT, intent to treat; KMT2A, histone-lysine N-methyltransferase 2A; NE, not evaluable; OS, overall survival; SC, standard of care chemotherapy.

**Supplementary Table 9. Selected  $\geq$ grade 3 treatment-emergent adverse events by CD22 positivity quartiles per local laboratory**

| TEAEs, n (%)        | CD22 positivity quartile |            |             |            |             |            |             |            |
|---------------------|--------------------------|------------|-------------|------------|-------------|------------|-------------|------------|
|                     | Q1                       |            | Q2          |            | Q3          |            | Q4          |            |
|                     | InO<br>N=38              | SC<br>N=31 | InO<br>N=38 | SC<br>N=34 | InO<br>N=41 | SC<br>N=31 | InO<br>N=35 | SC<br>N=37 |
| Any AEs             | 34 (89.5)                | 30 (96.8)  | 33 (86.8)   | 34 (100)   | 40 (97.6)   | 31 (100)   | 32 (91.4)   | 34 (91.9)  |
| Neutropenia         | 20 (52.6)                | 16 (51.6)  | 18 (47.4)   | 19 (55.9)  | 16 (39.0)   | 11 (35.5)  | 17 (48.6)   | 15 (40.5)  |
| Thrombocytopenia    | 13 (34.2)                | 17 (54.8)  | 17 (44.7)   | 23 (67.6)  | 19 (46.3)   | 17 (54.8)  | 11 (31.4)   | 24 (64.9)  |
| Leukopenia          | 10 (26.3)                | 9 (29.0)   | 12 (31.6)   | 18 (52.9)  | 12 (29.3)   | 10 (32.3)  | 7 (20.0)    | 14 (37.8)  |
| Lymphopenia         | 7 (18.4)                 | 7 (22.6)   | 8 (21.1)    | 10 (29.4)  | 6 (14.6)    | 9 (29.0)   | 3 (8.6)     | 7 (18.9)   |
| Febrile neutropenia | 6 (15.8)                 | 16 (51.6)  | 11 (28.9)   | 16 (47.1)  | 12 (29.3)   | 18 (58.1)  | 12 (34.3)   | 23 (62.2)  |
| Infection           | 8 (21.1)                 | 15 (48.4)  | 10 (26.3)   | 23 (67.6)  | 15 (36.6)   | 17 (54.8)  | 11 (31.4)   | 19 (51.4)  |
| Hyperbilirubinemia  | 2 (5.3)                  | 2 (6.5)    | 3 (7.9)     | 3 (8.8)    | 1 (2.4)     | 2 (6.5)    | 4 (11.4)    | 2 (5.4)    |
| SOS/VOD             | 5 (13.2)                 | 0          | 3 (7.9)     | 0          | 3 (7.3)     | 0          | 6 (17.1)    | 3 (8.1)    |
| Grade 3             | 2 (5.3)                  | 0          | 1 (2.6)     | 0          | 2 (4.9)     | 0          | 2 (5.7)     | 3 (8.1)    |
| Grade 4             | 0                        | 0          | 2 (5.3)     | 0          | 1 (2.4)     | 0          | 2 (5.7)     | 0          |
| Grade 5             | 3 (7.9)                  | 0          | 0           | 0          | 0           | 0          | 2 (5.7)     | 0          |

TEAEs were defined as AEs that commence on or after Cycle 1 Day 1 but within 42 days of last dose and all treatment-related AEs thereafter. All SOS/VOD events within 2 years of randomization were included regardless of causality. MedDRA (v19.1) coding dictionary was applied. AEs were graded according to the NCI CTCAE, version 3.0.

\*No Grade 5 neutropenia, thrombocytopenia, or febrile neutropenia occurred.

AE, adverse event; InO, inotuzumab ozogamicin; MedDRA, Medical Dictionary for Regulatory Activities; NCI CTCAE, National Cancer Institute Common Terminology Criteria for Adverse Events; Q, quartile; TEAE, treatment-emergent adverse event; SOS/VOD, sinusoidal obstruction syndrome/veno-occlusive disease.

## Supplementary Figure 1. Rate of MRD negativity in responding patients

### S1A. By central laboratory CD22 positivity

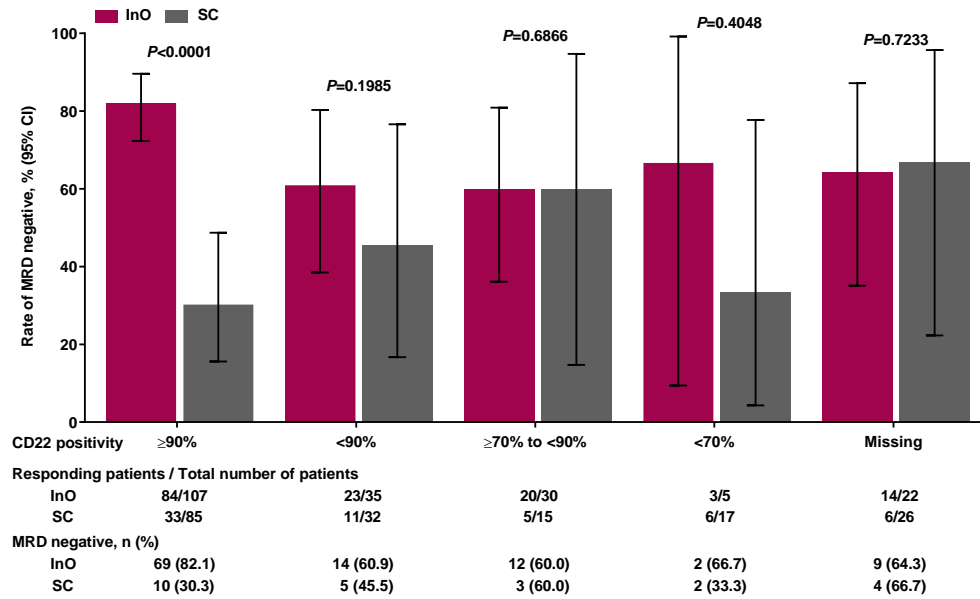

### S1B. By CD22 positivity quartile per local laboratory

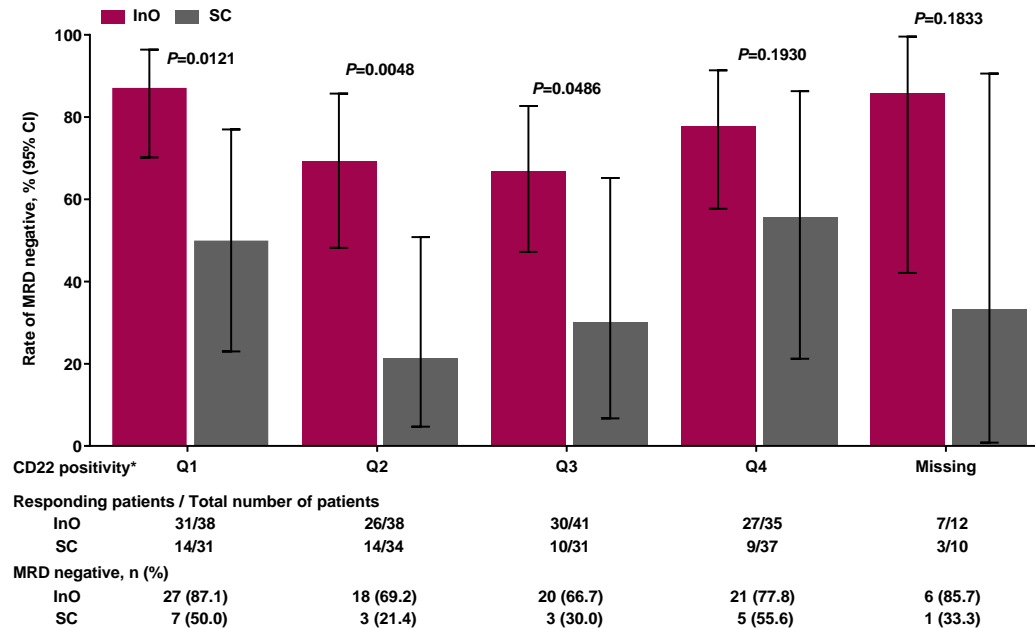

\* CD22 positivity quartile per local laboratory.

One-sided  $P$  value for MRD-negative was based on the test conducted on the MRD-negative rates between the two treatment groups. Minimum MRD%  $< 0.01\%$  was defined as MRD-negative.

**Supplementary Figure 2. PFS by CD22 expression as assessed by central laboratory MESF and CD22 positivity, and local laboratory**

**CD22 positivity quartile**

**S2A. CD22 MESF Q1**

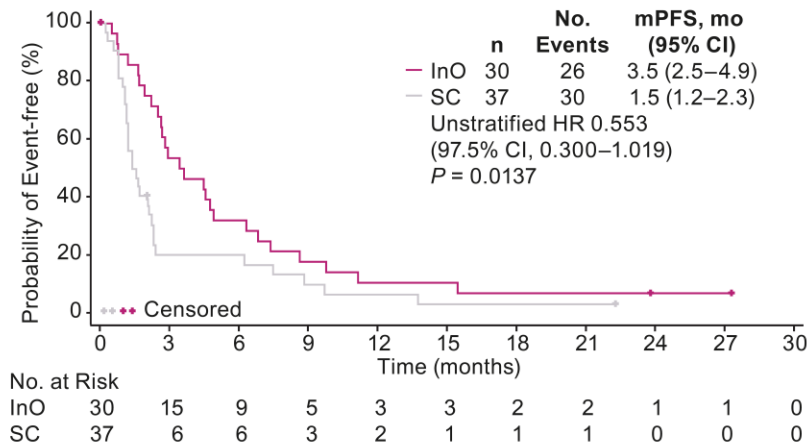

**S2B. CD22 MESF Q2**

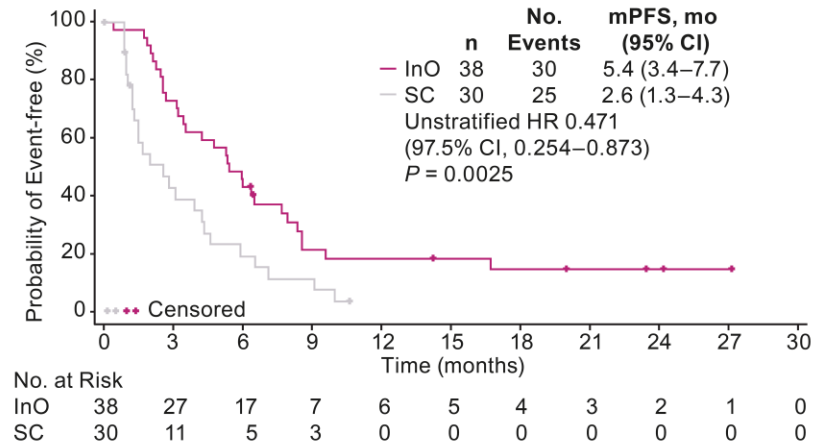

**S2C. CD22 MESF Q3**

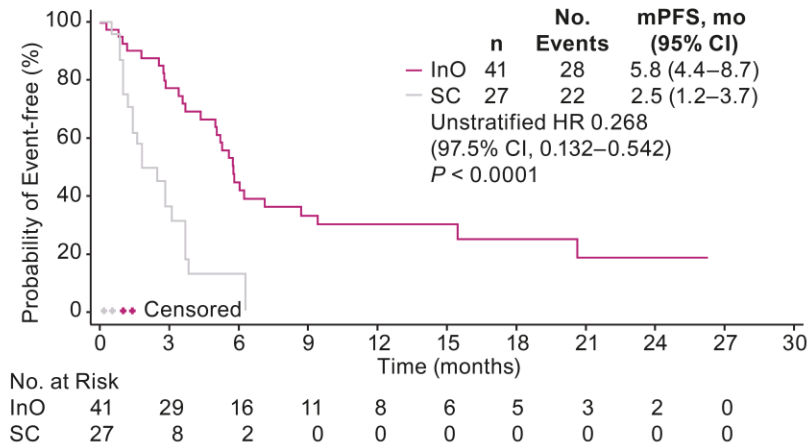

**S2D. CD22 MESF Q4**

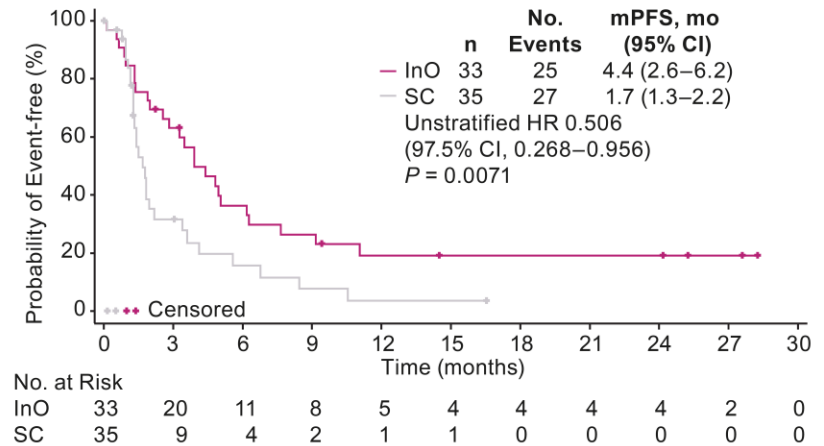



**S2E. CD22 MESF Q2-4**

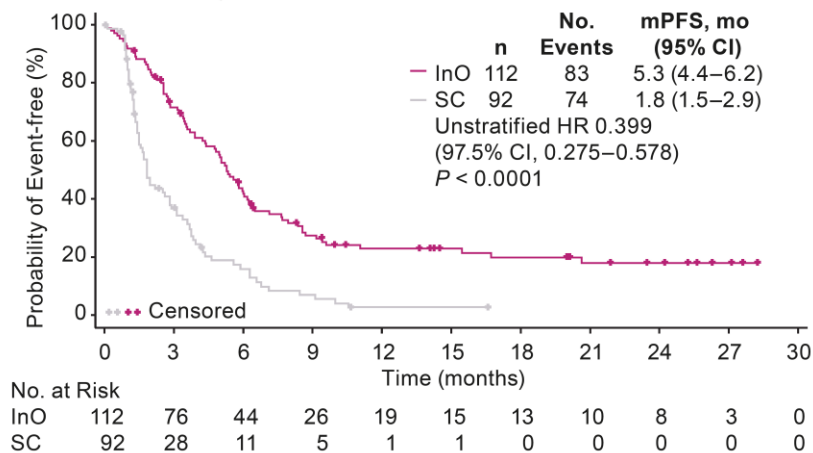

**S2F. CD22 positivity Q1 per local laboratory**

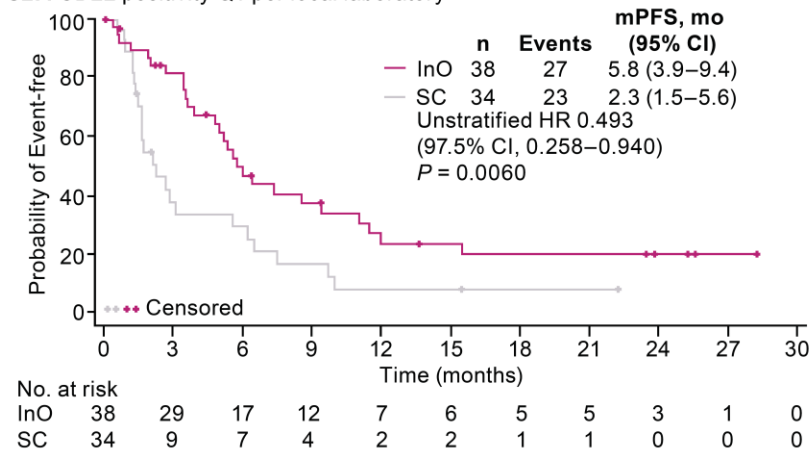

**S2G. CD22 positivity Q2 per local laboratory**

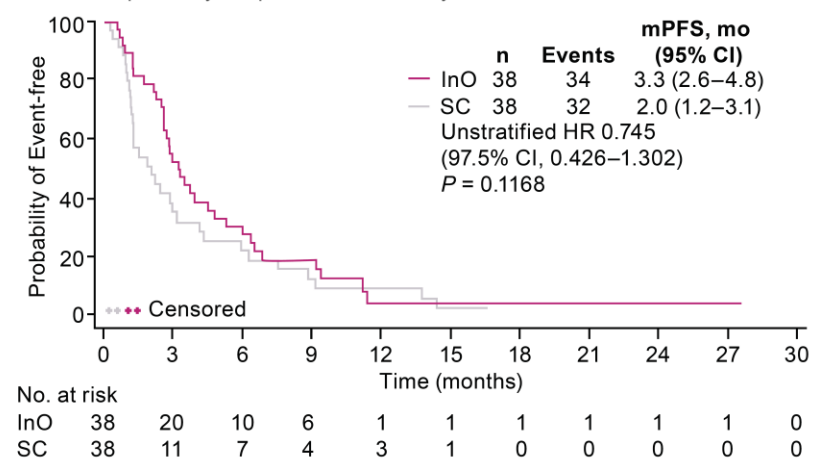

**S2H. CD22 positivity Q3 per local laboratory**

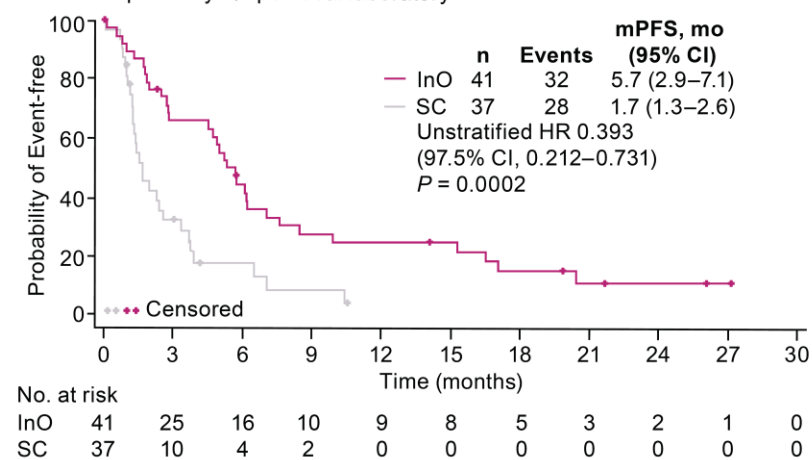

**S2I.** CD22 positivity Q4 per local laboratory

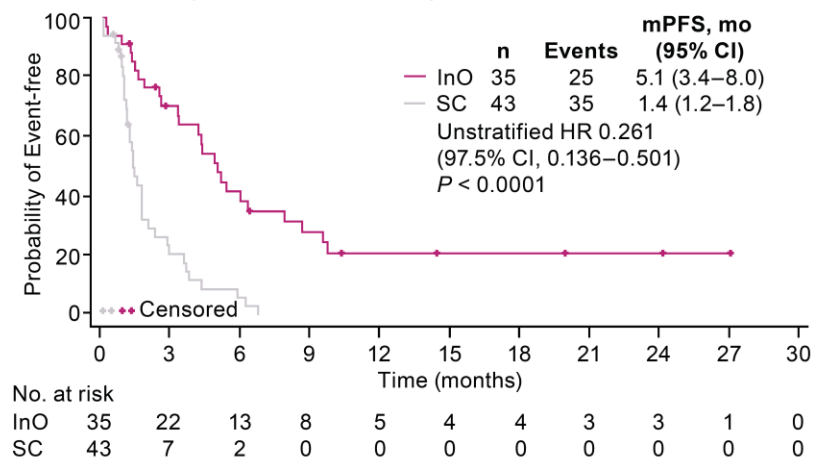

**S2J.** CD22 positivity Q2–4 per local laboratory

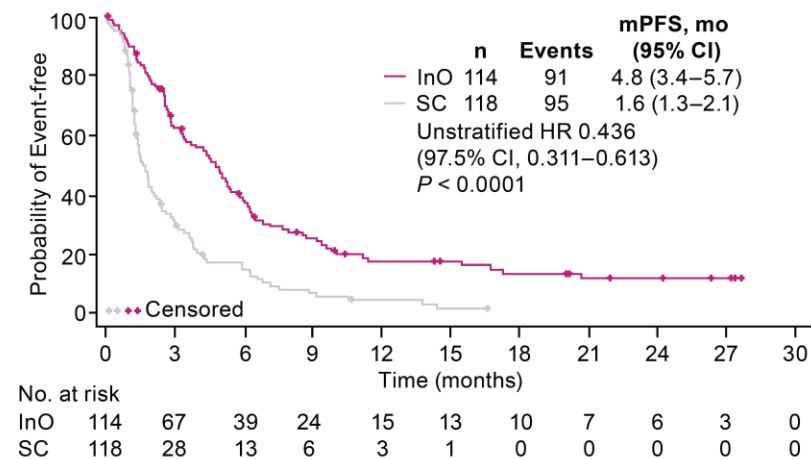

CI, confidence interval; HR, hazard ratio; InO, inotuzumab ozogamicin; mPFS, median PFS; OS, overall survival; PFS, progression-free survival; Q, quartile; SC, standard of care chemotherapy.

**Supplementary Figure 3. Duration of remission by CD22 expression as assessed by MESF and CD22 positivity**

**S3A. CD22 positivity  $\geq 90\%$**

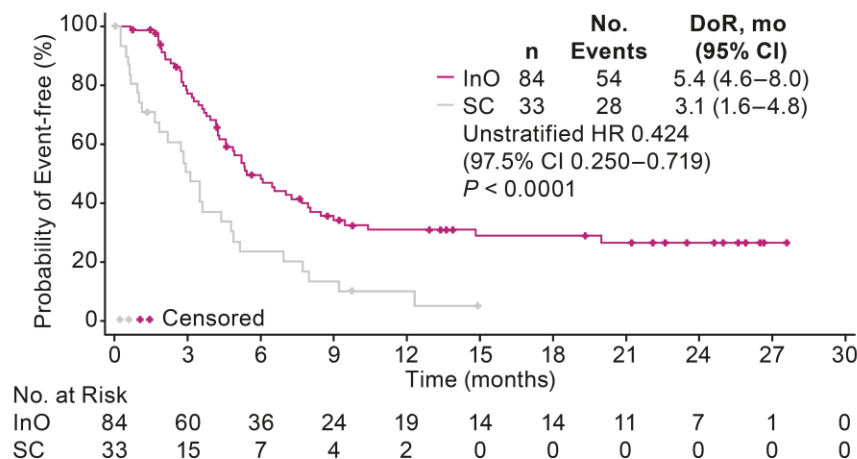

**S3B. CD22 positivity  $< 90\%$**

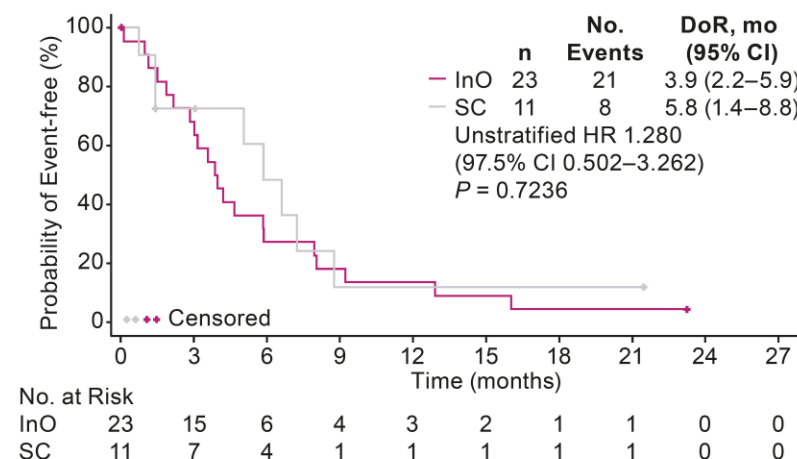

**S3C. CD22 MESF Q1**

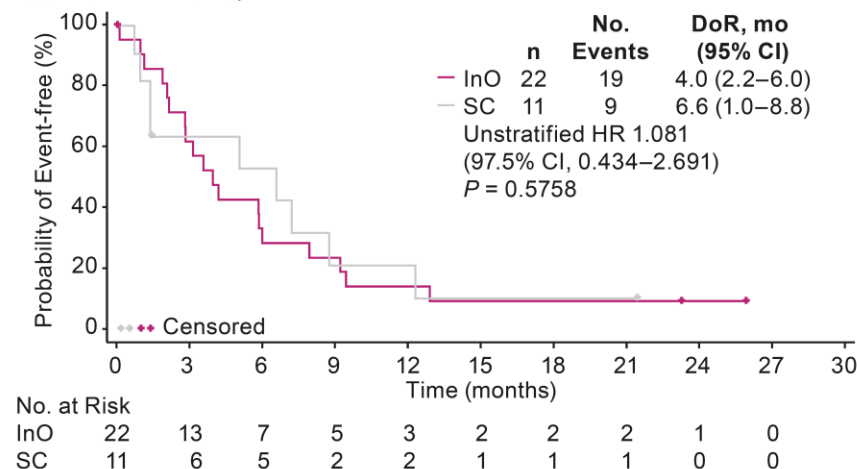

**S3D. CD22 MESF Q2**

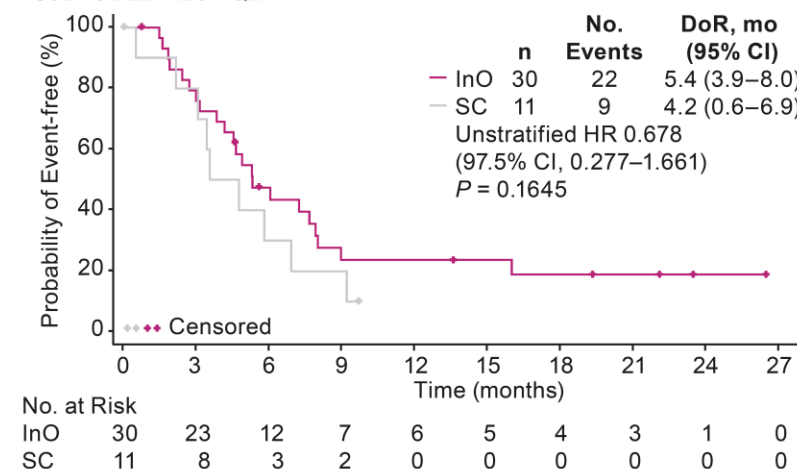

**S3E. CD22 MESF Q3**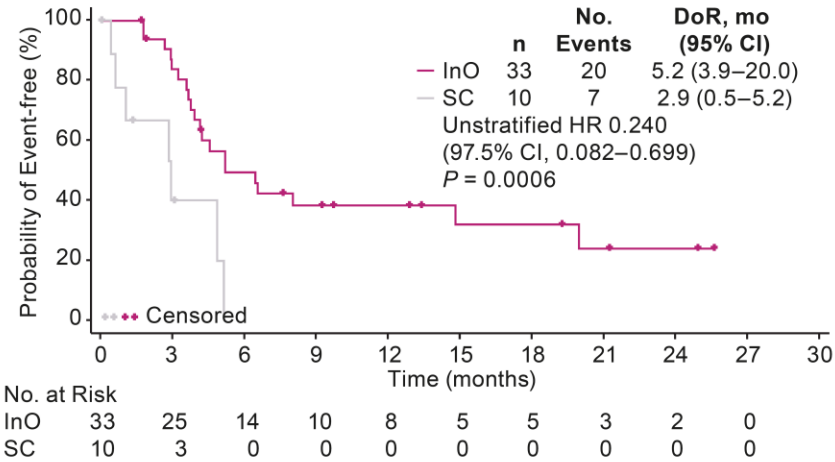**S3F. CD22 MESF Q4**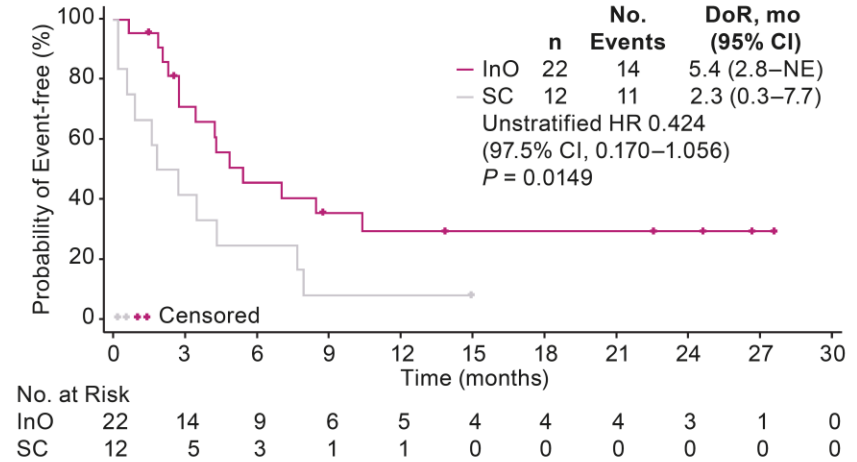**S3G. CD22 MESF Q2–4**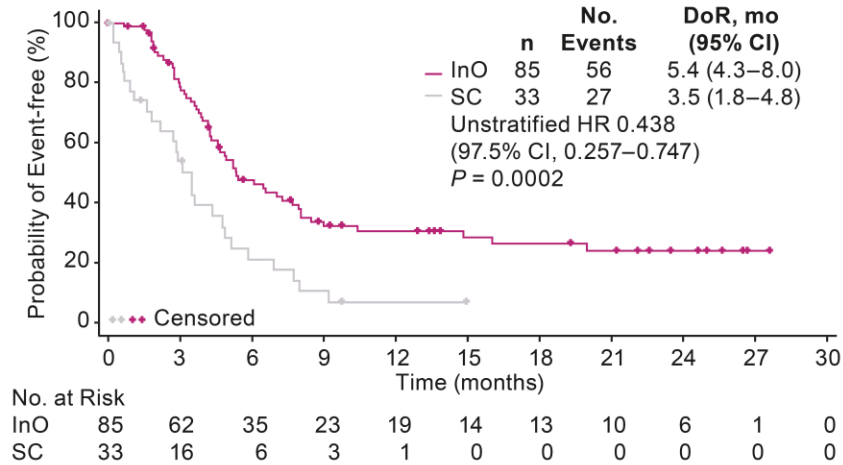**S3H. CD22 positivity Q1 per local laboratory**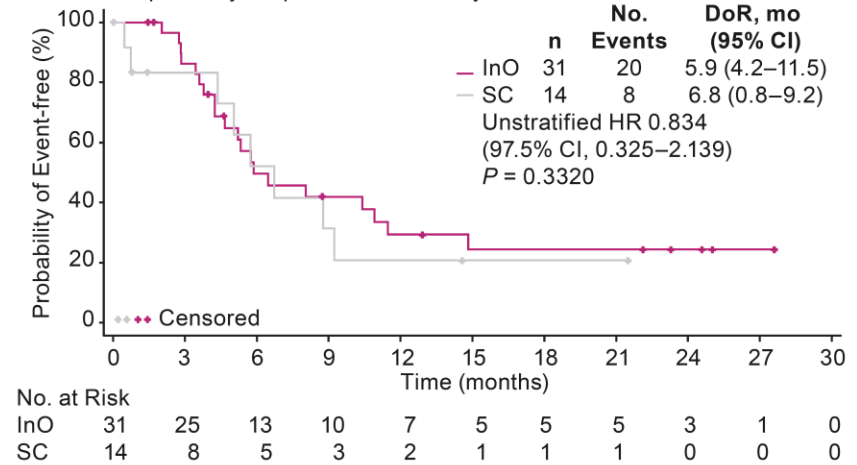

**S3I.** CD22 positivity Q2 per local laboratory

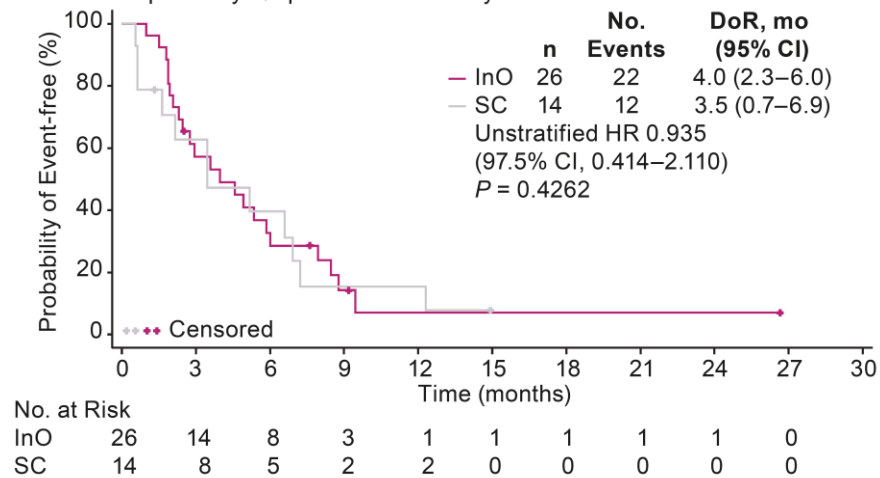

**S3J.** CD22 positivity Q3 per local laboratory

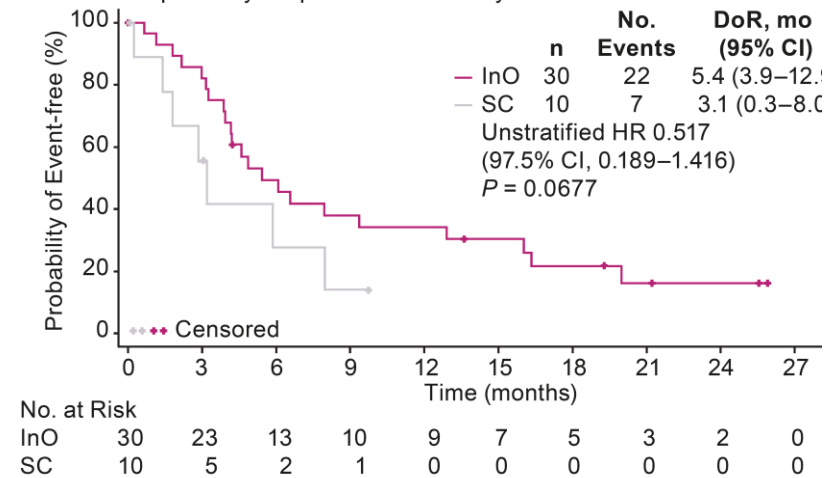

Median DoR (95% CI) in months is shown in each panel.

CI, confidence interval; DoR, duration of remission; HR, hazard ratio; InO, inotuzumab ozogamicin; Q, quartile; SC, standard of care chemotherapy.

**Supplementary Figure 4. CD22 positivity and CD22 expression in individual responders (CR/CRi) who subsequently relapsed at baseline and EOT/relapse.**

**S4A. CD22 positivity**

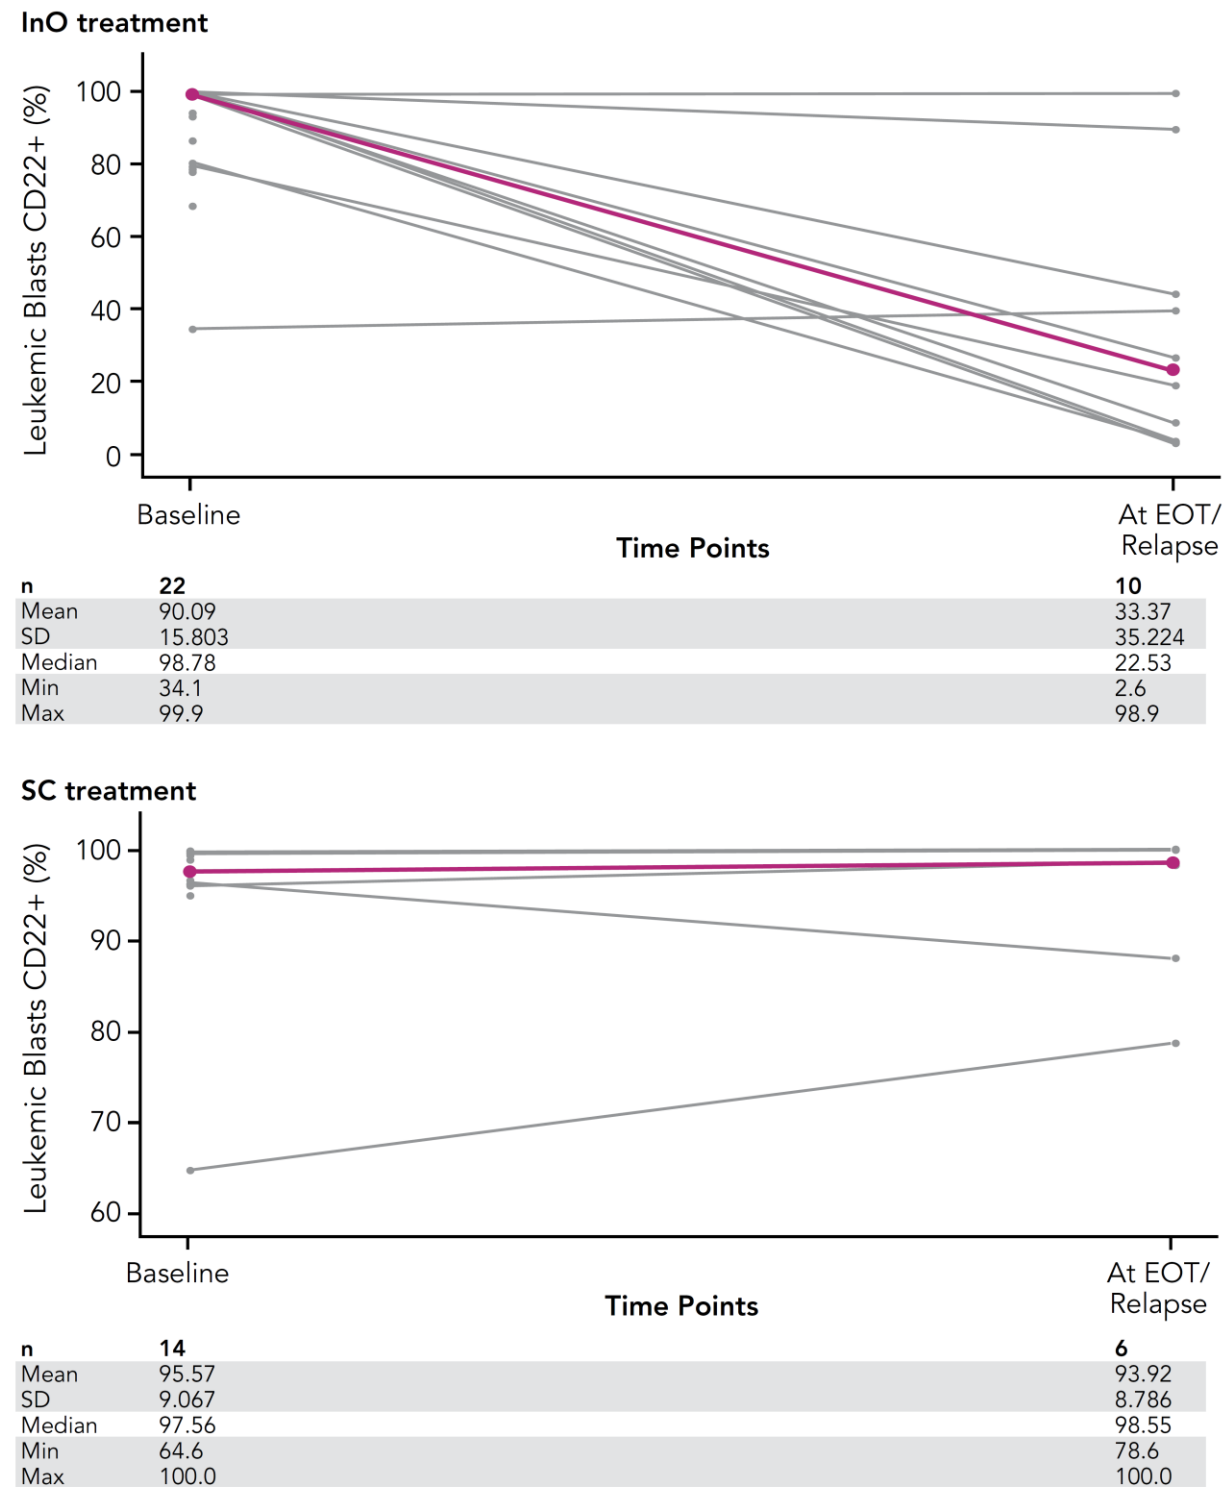

## S4B. CD22 MESF

### InO treatment

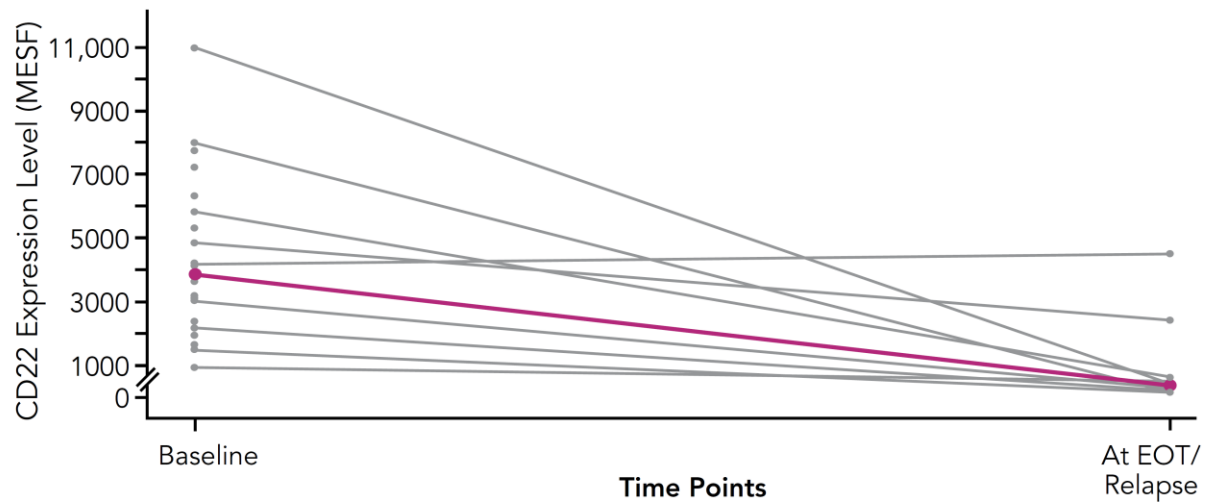

| n      | 20        | 10       |
|--------|-----------|----------|
| Mean   | 4332.50   | 864.80   |
| SD     | 2640.007  | 1428.330 |
| Median | 3795.00   | 275.50   |
| Min    | 853.00    | 74.00    |
| Max    | 10,947.00 | 4438.00  |

### SC treatment

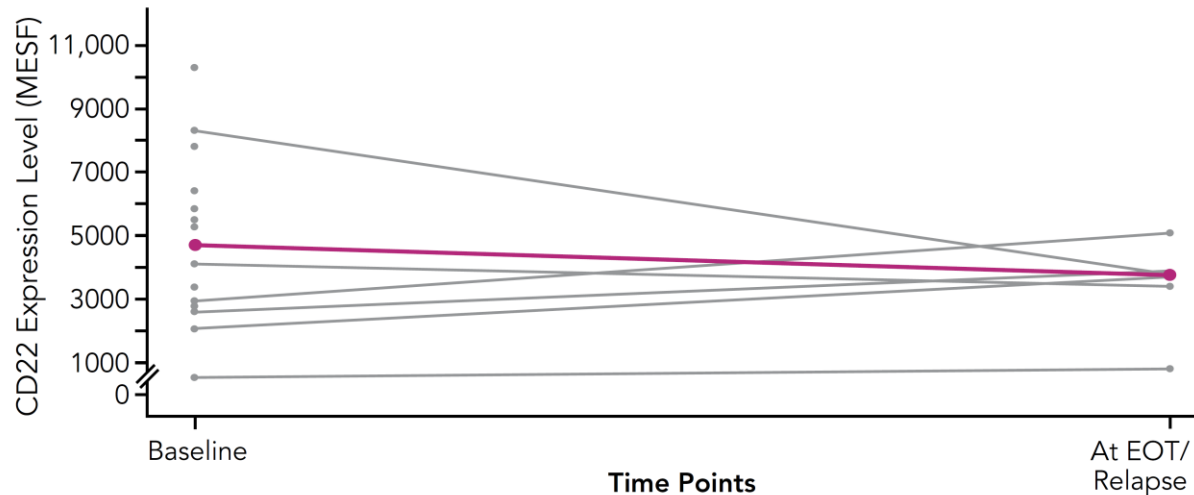

| n      | 14        | 6        |
|--------|-----------|----------|
| Mean   | 4789.07   | 3392.17  |
| SD     | 2724.459  | 1415.937 |
| Median | 4641.50   | 3694.50  |
| Min    | 470.0     | 753.00   |
| Max    | 10,226.00 | 5027.00  |

Median is represented by solid red. Individual patient profiles are shown in gray.

CR/CRi, complete remission/complete remission with incomplete hematologic recovery; EOT, end of treatment; InO, inotuzumab ozogamicin; max, maximum; MESF, molecules of equivalent soluble fluorochrome; min, minimum; SC, standard of care; SD, standard deviation.

**Supplementary Figure 5. CD22 positivity and CD22 expression in individual responders (CR/CRi) who subsequently relapsed at baseline and EOT/relapse for the B1931010 (NCT01363297) phase 1/2 study.**

**S5A. CD22 positivity**

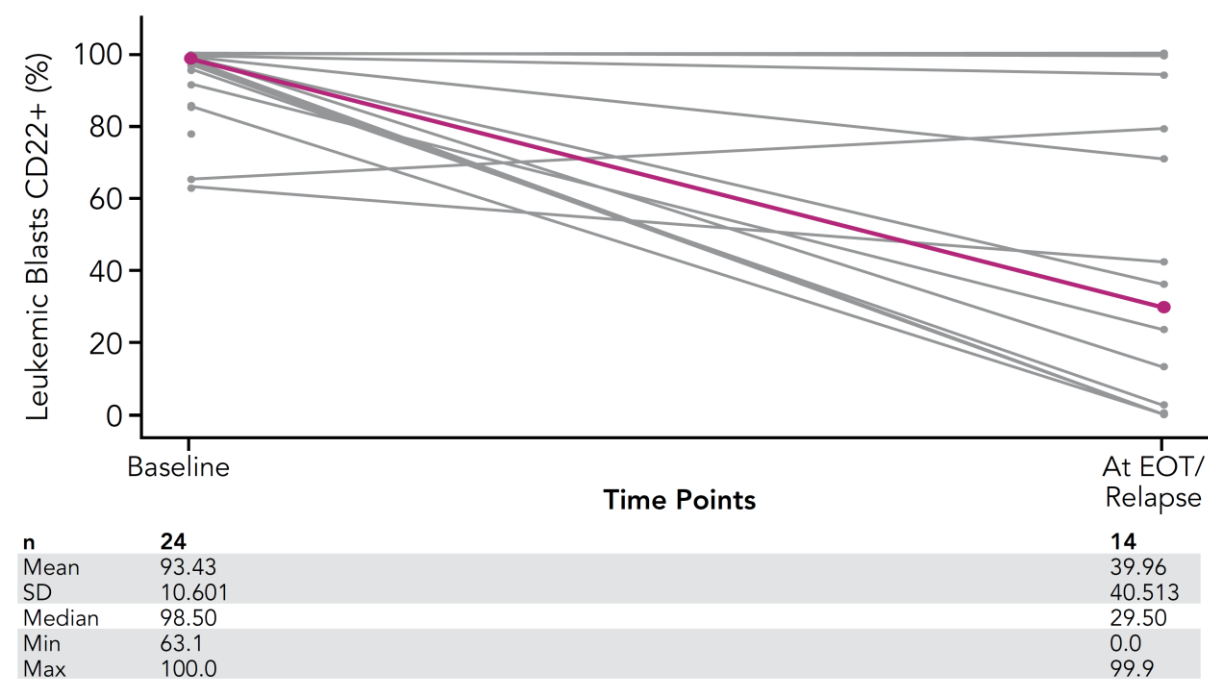

**S5B. CD22 MESF**

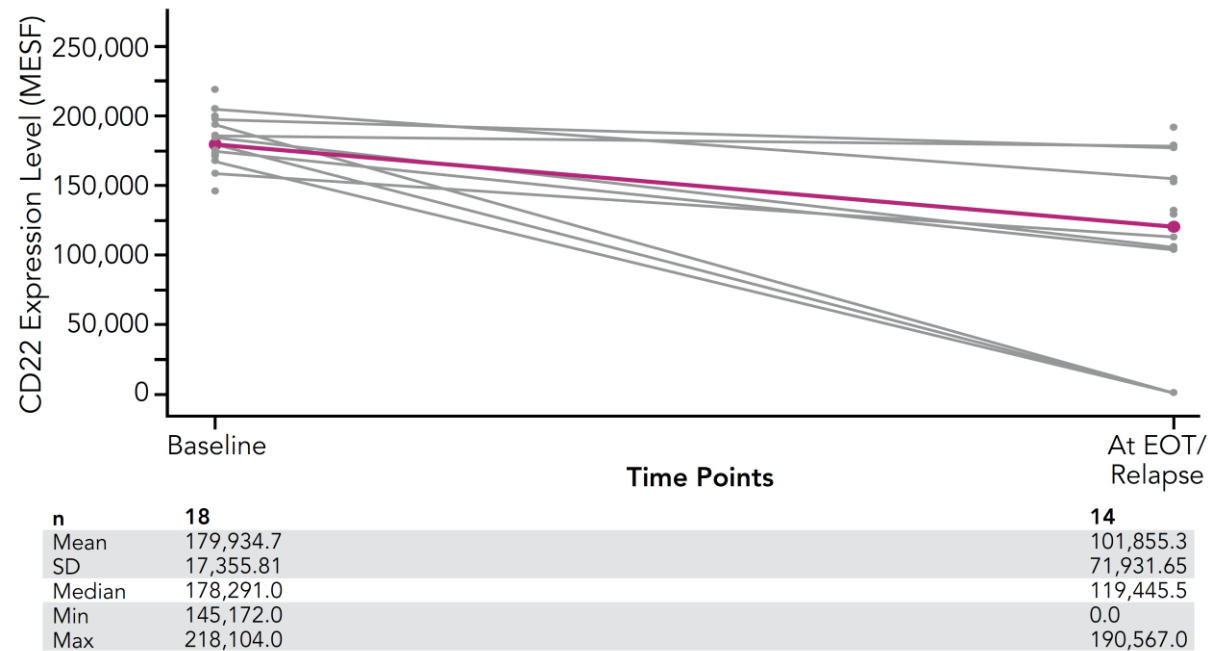



Median is represented by solid red. Individual patient profiles are shown in gray.

CR/CRi, complete remission/complete remission with incomplete hematologic recovery; EOT, end of treatment; InO, inotuzumab ozogamicin; max, maximum; MESF, molecules of equivalent soluble fluorochrome; min, minimum; SC, standard of care; SD, standard deviation.

**S6A.** Selected all-causality TEAEs. **S6B.** All-causality SOS/VOD

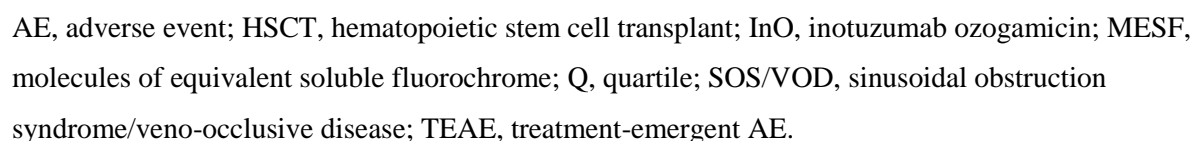

Supplement: 10780432ccr202399-sup-245383_2_supp_6878985_qnnx5w.pdf [file 10780432ccr202399-sup-245383_2_supp_6878985_qnnx5w.pdf]
